# Supplementary material for: A combination of borage seed oil and quercetin reduces fat accumulation and improves insulin sensitivity in obese rats
Source: Royal Society of Chemistry journal article supplement (doi:10.1039/d0fo00504e), 2020-01-01
Supplement: d0fo00504e1.pdf [file d0fo00504e1.pdf]

## Supplementary Material

**Supplementary table 1.** Specific gene expression probes used for the quantitative real time PCR analysis.

| 3T3-L1 gene expression analysis ( <i>Mus musculus</i> ) |                                                     |                       |
|---------------------------------------------------------|-----------------------------------------------------|-----------------------|
| Gene                                                    | Description                                         | Gene Expression Assay |
| <i>Pparg</i>                                            | Peroxisome proliferator activated receptor gamma    | Mm00440940_m1 *       |
| <i>Cebpa</i>                                            | CCAAT/enhancer binding protein (C/EBP), alpha       | Mm00514283_s1 *       |
| <i>Fasn</i>                                             | Fatty acid synthase                                 | Mm00662319_m1 *       |
| <i>Scd1</i>                                             | Stearoyl-Coenzyme A desaturase 1                    | Mm00772290_m1 *       |
| <i>Lpl</i>                                              | Lipoprotein lipase                                  | Mm00434764_m1 *       |
| <i>Tbp</i>                                              | TATA box binding protein. Housekeeping gene control | Mm00446973_m1 *       |

  

| Rat gene expression analysis ( <i>Rattus norvegicus</i> ) |                                                          |                              |
|-----------------------------------------------------------|----------------------------------------------------------|------------------------------|
| Gene                                                      | Description                                              | TaqMan Gene Expression Assay |
| <i>Adipoq</i>                                             | Adiponectin, C1Q and collagen domain containing          | Rn00595250_m1 *              |
| <i>Pparg</i>                                              | Peroxisome proliferator activated receptor gamma         | Rn00440945_m1 *              |
| <i>Cebpa</i>                                              | CCAAT/enhancer binding protein (C/EBP), alpha            | Rn00560963_s1 *              |
| <i>Fasn</i>                                               | Fatty acid synthase                                      | Rn00569117_m1 *              |
| <i>Srebf1</i>                                             | Sterol regulatory element binding transcription factor 1 | Rn01495769_m1 *              |
| <i>Glut1</i>                                              | Solute carrier family 2 member 1 ( <i>Slc2a1</i> )       | Rn.PT.58.12341770 **         |
| <i>Glut4</i>                                              | Solute carrier family 2 member 4 ( <i>Slc2a4</i> )       | Rn.PT.58.10149212 **         |
| <i>Tbp</i>                                                | TATA box binding protein. Housekeeping gene control      | Rn01455646_m1 *              |

\* TaqMan® Gene Expression Assays (Thermo Fisher Scientific).

\*\* PrimeTime qPCR Probe Assays (Integrated DNA Technologies, Inc).
